# Supplementary material
Source: PubMed Central journal article supplement (PMC5908525)
Supplement: rsif20170823supp1.pdf [file rsif20170823supp1.pdf]

1 **Supplementary materials:**

2  
3 **Combat biofouling with ridge-like surface morphology: A bioinspired study**

4 Jimin Fu<sup>1</sup>, Hua Zhang<sup>1,2</sup>, Zhenbin Guo<sup>1</sup>, Dan-qing Feng<sup>3</sup>, Vengatesen Thiyagarajan<sup>4</sup>, Haimin Yao<sup>1,\*</sup>

5 <sup>1</sup>Department of Mechanical Engineering, The Hong Kong Polytechnic University, Hung Hom,  
6 Kowloon, Hong Kong SAR, China

7 <sup>2</sup>Department of Chemistry and Chemical Engineering, Jiangxi Normal University, Nanchang,  
8 330022, China

9 <sup>3</sup> State-Province Joint Engineering Laboratory of Marine Bioproducts and Technology, College of  
10 Ocean and Earth Sciences, Xiamen University, Xiamen 361005, China

11 <sup>4</sup>The Swire Institute of Marine Sciences and School of Biological Sciences, The University of Hong  
12 Kong, Hong Kong SAR, China

13 \*Author for correspondence, E-mail: mmhyao@polyu.edu.hk (Haimin Yao)

14  
15 **1. Pull-off forces of different attachment configurations**

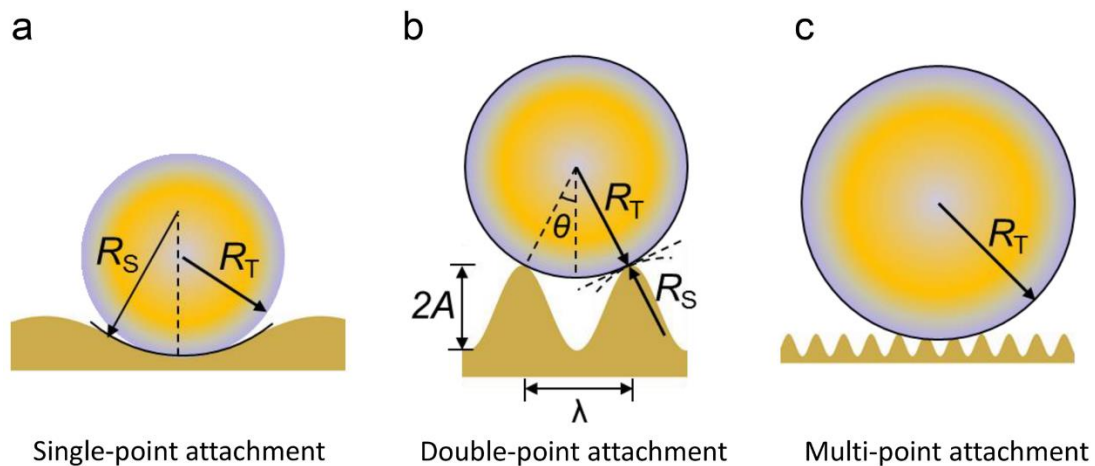

**Figure S1.** Schematics of three possible attachment configurations of a tubeworm attached on substrate with wavy profile: (a) single-point attachment, (b) double-point attachment and (c) multi-point attachment.

For a substrate with wavy profile, we assume that the profile is periodic and can be described by function  $y = -A\cos(2\pi x/\lambda)$ , where  $\lambda$  and  $A$  denote the wavelength and amplitude, two characteristic length scales of the profile, respectively. There are three distinct attachment configurations, depending on the characteristic length scales of the profile, as shown in figure S1a-c. If the wavelength of the profile  $\lambda$  is much larger than the tubeworm's radius  $R_T$ , the tubeworm rest at the trough of the groove, as shown in figure S1a. This configuration is called as single-point

27 attachment. For profile with smaller  $\lambda$ , the tubeworm has to straddle over a groove between two  
 28 adjacent ridges, forming a configuration called double-point attachment (see figure S1b). If  $\lambda$  is  
 29 much smaller than the size of the tubeworm, more than two contact points will form between the  
 30 tubeworm and the substrate, giving rise to a multi-point attachment configuration, as shown in figure  
 31 S1c.

### 32

### 33 1.1 Pull-off force of single-point attachment configuration

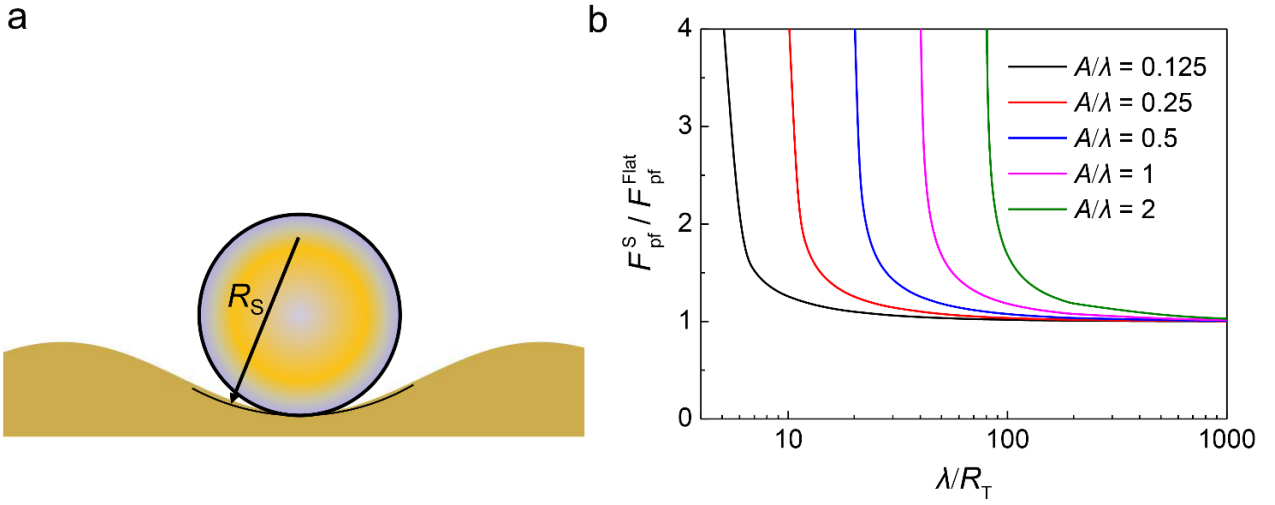

34  
 35 **Figure S2.** (a) Schematic of single-point attachment configuration. (b). Variation of the pull-off force  
 36 with  $\lambda/R_T$  for single-point attachment configuration with various  $A/\lambda$ .

37 In single-point attachment configuration, the cylinder rests on the trough region, as shown in figure  
 38 S2a, there is only one contact point between the cylinder and the substrate. Earlier studies indicated  
 39 that the pull-off force to separate two cylindrical bodies is given by [1]

$$40 \quad F_{pf}^S = 3 \left( \frac{\pi E^* W^2 R}{16} \right)^{1/3} \quad (S1.1)$$

41 where  $R = \frac{R_S R_T}{R_S + R_T}$ ,  $E^* = 1 / \left[ \frac{(1 - \nu_T^2)}{E_T} + \frac{(1 - \nu_S^2)}{E_S} \right]$  and  $W$  is the work of adhesion. Since pull-off

42 force between a cylinder and a flat substrate is

$$43 \quad F_{pf}^{Flat} = 3 \left( \frac{\pi E^* W^2 R_T}{16} \right)^{1/3}. \quad (S1.2)$$

44 Equation (S1.1) can be written as

45 
$$F_{\text{pf}}^S = \left( \frac{R_S}{R_S + R_T} \right)^{1/3} F_{\text{pf}}^{\text{Flat}} . \quad (\text{S1.3})$$

46 Here,  $R_T$  and  $R_S$  stand for the radii of curvature of the tubeworm and substrate at the contact point  
 47 respectively. For a profile defined by function  $y = -A \cos\left(\frac{2\pi x}{\lambda}\right)$ , the radius of curvature at the trough

48  $R_S$  can be calculated by  $R_S = -\frac{(1 + y'(0)^2)^{3/2}}{y''(0)}$ , where  $y'(0)$  and  $y''(0)$  stand for the first and second

49 derivatives of function  $y$  at  $x=0$ . Thus,  $R_S$  is given by

50 
$$R_S = -\frac{\lambda^2}{4\pi^2 A} . \quad (\text{S1.4})$$

51 By inserting equation (S1.4) into (S1.3), the normalized pull-off force for single-point attachment  
 52 configuration,  $F_{\text{pf}}^S / F_{\text{pf}}^{\text{Flat}}$ , can be given as a function of  $\lambda/R_T$  for a given  $A/\lambda$ . The dependence of

53  $F_{\text{pf}}^S / F_{\text{pf}}^{\text{Flat}}$  on  $\lambda/R_T$  for different  $A/\lambda$  is shown in figure S2b. From equation (S1.3) and figure S2b, it

54 can be noticed that  $F_{\text{pf}}^S$  goes to infinity when  $R_S = -R_T$ . Such unrealistic singularity of the predicted

55 pull-off force is essentially attributed to the conventional parabolic approximation for circular profiles

56 in contact mechanics [1], because when  $R_S = -R_T$ , this result actually describes the pull-off force

57 between a concave surface and a conformal solid with exactly the same parabolic-shaped profile. To

58 overcome this dilemma, we have to estimate an upper limit for  $F_{\text{pf}}^S$ .

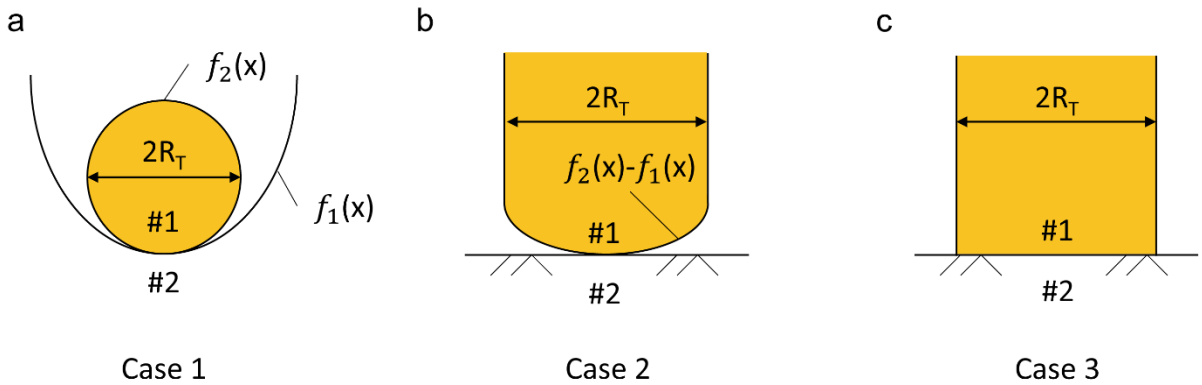

59 **Figure S3.** (a) Contact between two solids with profile functions  $f_1(x)$  and  $f_2(x)$ . (b) Contact between a  
 60 solid with profile function  $f_2(x) - f_1(x)$  and a flat substrate. (c) Contact between a solid with flat  
 61 profile and a flat substrate.  
 62

63 For adhesive contact case between two solid materials with profile functions  $f_1(x)$  and  $f_2(x)$  (see  
 64 Figure S3a), it can be demonstrated in contact mechanics that the pull-off force in-between is equal to  
 65 that of an equivalent case in which one material has profile function  $f_2(x) - f_1(x)$  while the other is  
 66 totally flat (see Figure S3b). Meanwhile, it can be demonstrated that such pull-off force reaches its  
 67 maximum when the profile is flat, namely  $f_2(x) - f_1(x) = 0$ . This cap value is given by

$$68 \quad F_{\text{pf}}^{\text{Cap}} = \sqrt{2\pi E^* W R_T}, \quad (\text{S2.1})$$

69 which can be further expressed in terms of  $F_{\text{pf}}^{\text{Flat}}$  as

$$70 \quad F_{\text{pf}}^{\text{Cap}} = 1.19 \left( \frac{\pi E^* R_T}{W} \right)^{1/6} F_{\text{pf}}^{\text{Flat}}. \quad (\text{S2.2})$$

71 Here, the tubeworm larva is assumed as an elastic cylinder with radius  $R_T = 50 \mu\text{m}$ , and the  
 72 adhesion system including the larva and the substrate is assumed perfectly bonded with elastic  
 73 modulus  $E^* = 100 \text{ kPa}$  and work of adhesion  $W = 0.1 \text{ J/m}^2$ . These values taken in the theoretical  
 74 modeling are close to those in similar natural adhesion systems as shown in Table S1. The cap value  
 75 can be determined by using equation (S2.2), is around as 2.8 times as  $F_{\text{pf}}^{\text{Flat}}$ .

76

77 **Table S1.** Typical mechanical properties in natural adhesion systems and the theoretical modeling.

| Fouler                  | Elastic modulus $E$ | Work of adhesion $W$      |
|-------------------------|---------------------|---------------------------|
| Cell <sup>[2-4]</sup>   | 0.1-100 kPa         | 0.01-10 mJ/m <sup>2</sup> |
| Alga <sup>[5, 6]</sup>  | 2-10 MPa            | 0.01-0.1 J/m <sup>2</sup> |
| Barnacle <sup>[7]</sup> | 0.2- 5 MPa          |                           |
| Theoretical modeling    | 100 kPa             | 0.1 J/m <sup>2</sup>      |

78

## 79 1.2 Pull-off force of double-point attachment configuration

a

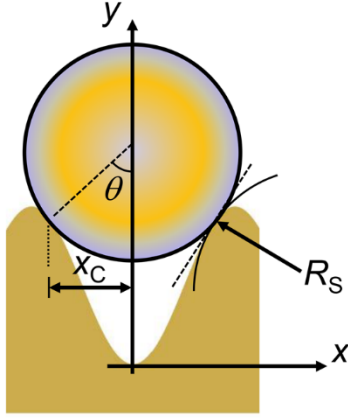

b

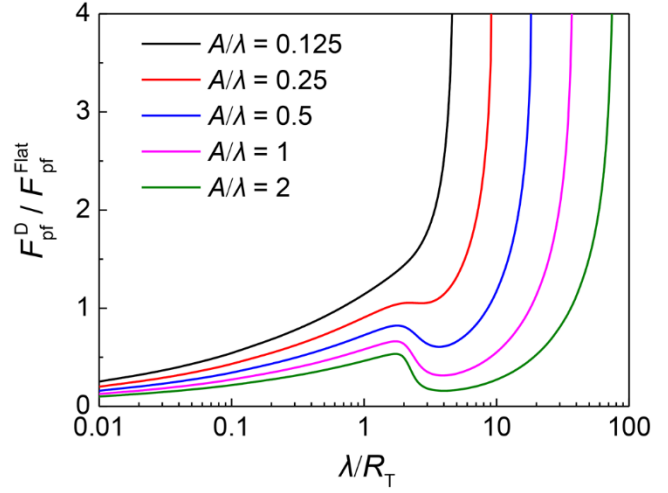

80

81 **Figure S4.** (a) Schematic of double-point attachment configuration. (b). Variation of the pull-off  
82 force with  $\lambda/R_T$  for double-point attachment configuration with various  $A/\lambda$ .

83 For double-point attachment configuration, the cylinder straddles over a groove between two  
84 adjacent ridges. The pull-off force equals the resultant force of the adhesion on both contact points

$$85 \quad F_{\text{pf}}^{\text{D}} = 2 \cos \theta \cdot F_{\text{pf}}^{\text{ridge}}, \quad (\text{S3.1})$$

86 where  $F_{\text{pf}}^{\text{ridge}}$  is the pull-off force on one ridge, and  $\theta$  is the contact angle designated in figure S4a.

87 For the adhesion with a single ridge, the pull-off force can be written as

$$88 \quad F_{\text{pf}}^{\text{ridge}} = \left( \frac{R_S}{R_S + R_T} \right)^{1/3} F_{\text{pf}}^{\text{Flat}}, \quad (\text{S3.2})$$

89 where  $R_S$  is the curvature radius at the contact point of the substrate.

90 Combining equation (S3.1) and (S3.2),  $F_{\text{pf}}^{\text{D}}$  can be rewritten as

$$91 \quad F_{\text{pf}}^{\text{D}} = 2 \cos \theta \cdot \left( \frac{R_S}{R_S + R_T} \right)^{1/3} F_{\text{pf}}^{\text{Flat}}. \quad (\text{S3.3})$$

92 The radius of curvature at the contact point  $R_S$  can be calculated from the profile function  $y(x)$

93 through

$$94 \quad R_S = - \frac{(1 + y'^2)^{3/2}}{y''}, \quad (\text{S3.4})$$

95 where the first and second derivatives of the profile function are given by  $y' = A \cdot (2\pi/\lambda) \cdot \sin(2\pi x_C/\lambda)$   
 96 and  $y'' = A \cdot (2\pi/\lambda)^2 \cdot \cos(2\pi x_C/\lambda)$ , respectively. In above expressions,  $x_C$  presents the coordinate of  
 97 the contact point in the  $x$  direction (see Figure S4a), which can be determined from following  
 98 geometrical relationship

$$99 \quad \frac{x_C}{\sqrt{R_T^2 - x_C^2}} = 2\pi \cdot \left(\frac{A}{\lambda}\right) \cdot \sin\left(\frac{2\pi x_C}{\lambda}\right). \quad (S3.5)$$

100 Therefore, for given  $A/\lambda$ , it can be seen from equation (S3.5) that normalized coordinate  $x_C/R_T$  is  
 101 a function of  $\lambda/R_T$ .

102 As to the contact angel  $\theta$ , basic geometric relationship implies that

$$103 \quad \cos \theta = \sqrt{1 - (x_C/R_T)^2}. \quad (S3.6)$$

104 Equation (S3.6) indicates that for given  $A/\lambda$ ,  $\cos \theta$  is a function of  $\lambda/R_T$ . Therefore,  $F_{pf}^D/F_{pf}^{Flat}$   
 105 according to equation (S3.3) should be a function of  $\lambda/R_T$  for given  $A/\lambda$ . Figure S4b shows the  
 106 variation of  $F_{pf}^D/F_{pf}^{Flat}$  with  $\lambda/R_T$  for different  $A/\lambda$ . As  $\lambda/R_T$  increases,  $F_{pf}^D$  will approach to  
 107  $F_{pf}^S$  which has singularity when  $R_T = -R_S$  or  $\lambda/R_T = 4\pi^2 A/\lambda$ . This singularity problem has been  
 108 well addressed above by introducing a reasonable cap for the pull-off force when  $R_S = -R_T$ .

109  
 110 **1.3 Pull-off force of multi-point attachment configuration**

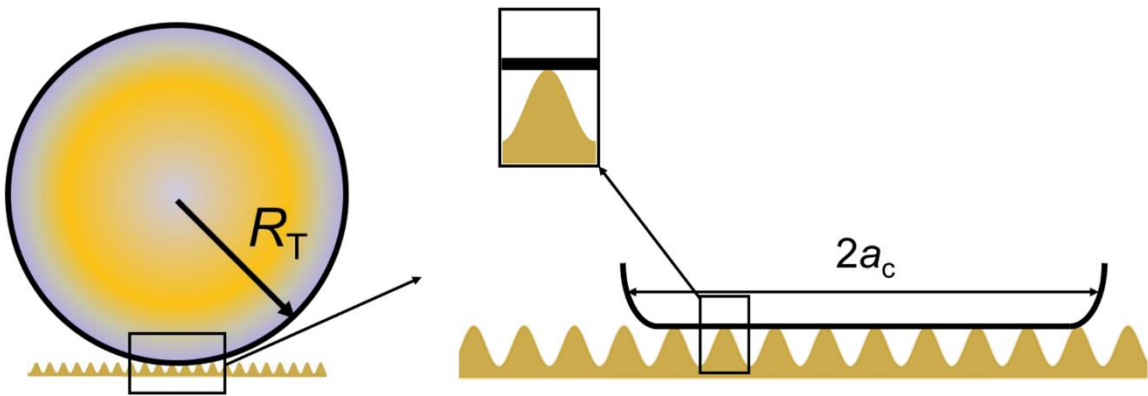

111  
 112 **Figure S5.** Schematic of multi-point attachment configuration.

113 With the decrease of the  $\lambda$ , more than two ridges will contact the cylinder, as shown in figure S5.  
 114 To simplify the problem, the contact at each ridge is assumed identical. Thus, for this multi-point  
 115 attachment configuration, the pull-off force  $F_{\text{pf}}^{\text{M}}$  can be roughly estimated as

$$116 \quad F_{\text{pf}}^{\text{M}} = N \cdot F_{\text{pf}}^{\text{ridge}}, \quad (\text{S4.1})$$

117 where  $N$  is the number of the ridges in contact with the cylinder, and  $F_{\text{pf}}^{\text{ridge}}$  is the pull-off force  
 118 contributed by one ridge. The number of the ridges  $N$  can be estimated from the expression

$$119 \quad N = \frac{2a_{\text{c}}}{\lambda}, \quad (\text{S4.2})$$

120 where  $2a_{\text{c}}$  is the nominal contact width between the cylinder and the substrate at the pull-off  
 121 moment, as shown in figure S5, which can be given by

$$122 \quad 2a_{\text{c}} = 2 \cdot \left( \frac{2W_{\text{equ}} R_{\text{T}}^2}{\pi E^*} \right)^{\frac{1}{3}} \quad (\text{S4.3})$$

123 where  $W_{\text{equ}}$  is the equivalent adhesion energy between the cylinder and wavy substrate given by

$$124 \quad W_{\text{equ}} = \frac{2a_{\text{each}}}{\lambda} \cdot W = \left( \frac{W^4 \lambda}{\pi^5 E^* A^2} \right)^{\frac{1}{3}}. \quad (\text{S4.4})$$

125 Meanwhile, the pull-off force contributed by one ridge is given by

$$126 \quad F_{\text{pf}}^{\text{ridge}} = \left( \frac{\lambda^2}{4\pi^2 A R_{\text{T}}} \right)^{\frac{1}{3}} F_{\text{pf}}^{\text{Flat}}. \quad (\text{S4.5})$$

127 By combining equation (S4.1- 4.5), it can be estimated that

$$128 \quad F_{\text{pf}}^{\text{M}} = \left( \frac{2}{\pi} \right)^{10/9} \left( \frac{W}{2\pi E^* R_{\text{T}}} \right)^{4/9} \left( \frac{\lambda}{A} \right)^{5/9} \left( \frac{\lambda}{R_{\text{T}}} \right)^{-7/9} \cdot F_{\text{pf}}^{\text{Flat}}. \quad (\text{S4.6})$$

129

130

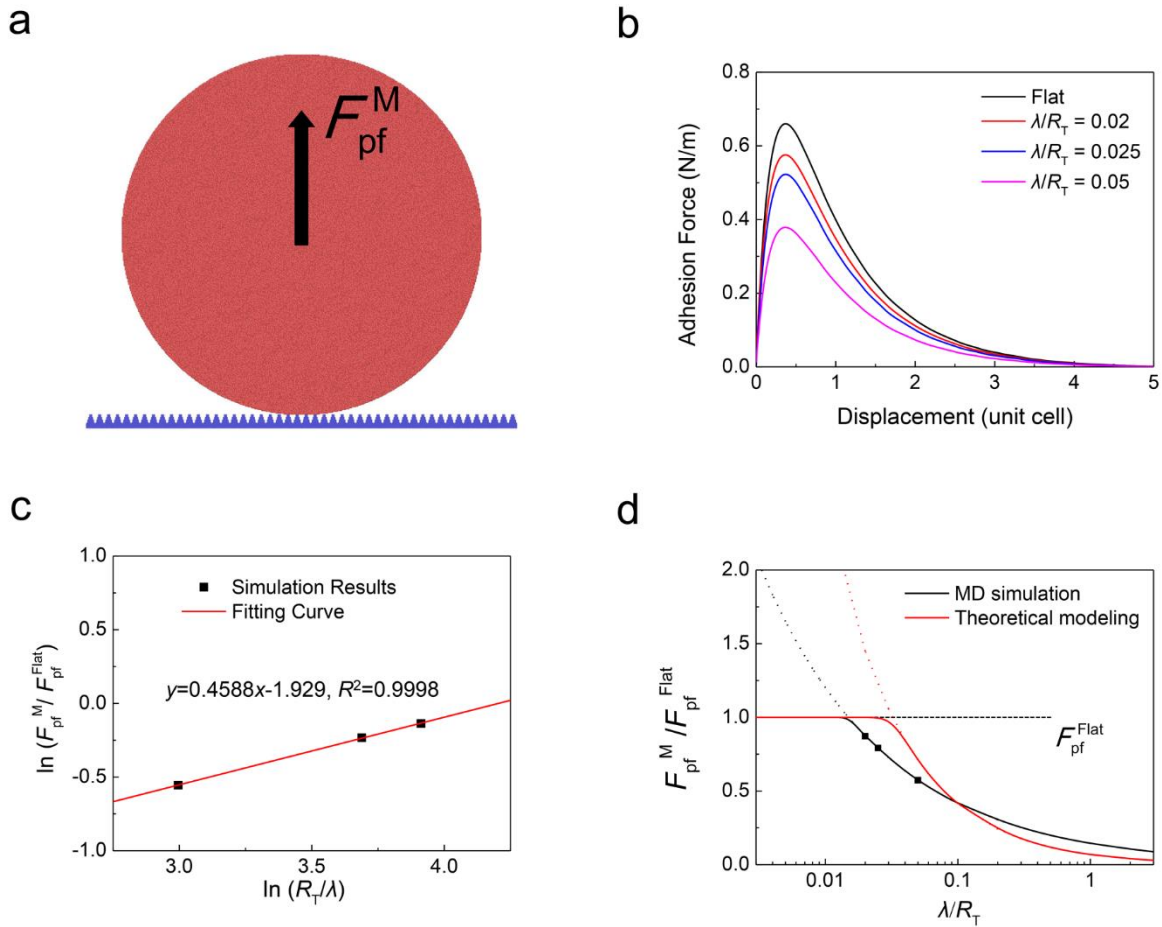

131

132 **Figure S6.** (a) Schematics of the CGMD simulation model. (b). The calculated dependence of the  
 133 adhesion force on the displacement of the cylinder. (c) Calculated evolution of the normalized pull-  
 134 off force with  $\ln(R_T/\lambda)$ . Here  $A/\lambda$  is taken as 0.5. (d) Comparison of calculated normalized pull-off  
 135 force as a function  $\lambda/R_T$  with the theoretical prediction given by equation (S4.6). For the plot of the  
 136 theoretical curve, related parameters were taken as the representative values shown in Table S1.

137

138 In the derivation of equation (S4.6), the interaction between the adhesions on different ridges is  
 139 neglected. To shed light on the coupling effect of adjacent adhesion points, coarse grain molecular  
 140 dynamics (CGMD) simulations were carried out with LAMMPS package [8]. Figure S6a shows the  
 141 simulation model, in which an elastic cylinder is spontaneously attached onto a sinusoidal substrate  
 142 and then is pulled off from it at a constant speed. Lennard-Jones (L-J) force field



143  $U_{LJ}(r) = 4\varepsilon[(\sigma/r)^{12} - (\sigma/r)^6]$  was applied to describe the interactions between the atoms in the  
 144 system, including the cohesion inside the cylinder and interfacial adhesion between the cylinder and  
 145 substrate. Due to the limitation of the computation scale in MD simulation, the radius of the cylinder,  
 146 which was taken as  $R_T = 50 \mu\text{m}$  in our previous theoretical modelling, was set as 400 nm. Equation  
 147 (S4.6) implies that the effect of such discrepancy in  $R_T$  on the pull-off force can be compensated as  
 148 long as  $W/E^*R_T$  remains unchanged. For this purpose, in the L-J potential describing the cohesion in  
 149 the cylinder,  $\varepsilon$  and  $\sigma$  were taken as 0.00185 eV and 1.29 nm respectively, giving rise to the  
 150 effective Young's modulus of the cylinder equal to 12.5 MPa; in the L-J potential describing the  
 151 interfacial adhesion,  $\varepsilon$  and  $\sigma$  were taken as 0.33 eV and 2.58 nm respectively, resulting in the  
 152 adhesion energy  $W = 0.1 \text{ J/m}^2$ . As to the substrate, in addition to the flat benchmark, three sinusoidal  
 153 profiles with  $\lambda/R_T$  equal to 0.02, 0.025 and 0.05 were considered with  $A/\lambda$  being taken as 0.5 always.  
 154 The substrate was assumed rigid by fixing the displacements of its atoms in all dimensions. In each  
 155 simulation case, the system was initially relaxed using the canonical ensemble (NVT) for 200 ps. The  
 156 time step of the simulations was taken as 1 fs and temperature was controlled at 300 K with the  
 157 Langevin thermostat. Visualization program OVITO [10] was used to visualize and output the  
 158 simulations results.

159 Figure S6b shows the evolution of the calculated adhesion force as the cylinder recedes from the  
 160 substrate. Clearly, the pull-off force, which refers to the maximum adhesion force, depends on  $\lambda/R_T$ .  
 161 By fitting the calculated data points (see Figure S6c), such dependence is found to follow the trend  
 162 depicted by function of  $\ln(F_{\text{pf}}^{\text{M}}/F_{\text{pf}}^{\text{Flat}}) = 0.4588 \cdot \ln(R_T/\lambda) - 1.929$ , which implies

$$163 F_{\text{pf}}^{\text{M}} = 0.1453 \cdot \left( \frac{\lambda}{R_T} \right)^{-0.4588} F_{\text{pf}}^{\text{Flat}}. \quad (\text{S4.7})$$

164 Nevertheless, both equations (S4.6) and (S4.7) indicate that  $F_{pf}^M$  will go to infinity as  $\lambda$  approaches  
165 zero. This trend is clearly contradictory to the fact that  $F_{pf}^M$  should asymptotically approach to  $F_{pf}^{Flat}$   
166 as  $\lambda/R_T$  approaches zero. Therefore, it should be the applicable condition of equations (S4.6) and  
167 (S4.7) that  $F_{pf}^M \leq F_{pf}^{Flat}$  or  $F_{pf}^M / F_{pf}^{Flat} \leq 1$ . Figure S6d plots the equation (S4.7) in comparison with  
168 equation (S4.6). Both curves exhibit the similar trends as  $\lambda/R_T$  increases, implying that equation  
169 (S4.6) gives a reasonable estimation to the pull-off force even though the coupling effect is neglected.

## 171 2. Culture of the tubeworm larvae for settlement tests

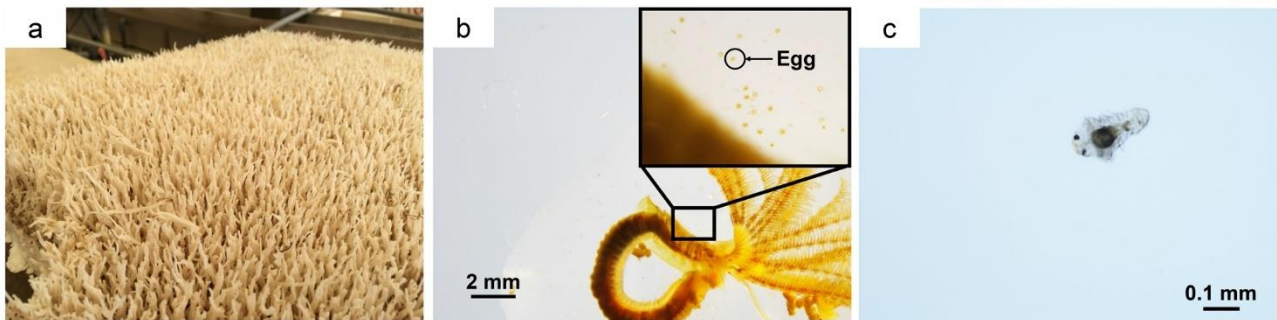

172 **Figure S7.** (a) Adult tubeworms *Hydroides elegans* attached on a plastic plate. (b) Adult tubeworm  
173 removed from calcified tubular shell. (c) Larval tubeworm swimming in the seawater to detect the  
174 target surface for attachment.  
175

176 Adult tubeworms *H. elegans* (figure S7a) were collected from a bay near Yung Shue O, Hong Kong.  
177 After breaking the tubular shells of some tubeworm adults with tweezers, eggs and sperms were  
178 released and collected, as shown in figure S7b. Fertilization was carried out by mixing the collected  
179 eggs and sperms for 30 min in filtered seawater (with 0.22  $\mu\text{m}$  mesh sized filter) at ambient temperature  
180 (25  $^{\circ}\text{C}$ ), normal pH value ( $\sim 8.1$ ) and salinity (34 psu). After fertilization, the embryos were raised at  
181 the density of 5 larvae  $\text{ml}^{-1}$  in the culture tanks for 5-7 days. During this period, the seawater was  
182 refreshed every two days and the larvae were fed with algal *Isochrysis galbana* (about  $10^5$  cells  $\text{ml}^{-1}$ ).  
183 The larvae aged 5-7 days (see figure S7c) were ready for attachment tests. To facilitate the settlement  
184 on biofilm-free surfaces like our samples, artificial settlement stimuli (CsCl, 5 mmol/L) was applied.

185  
186

187 **References**

- 188 [1] Chaudhury, M.K., Weaver, T., Hui, C.Y. & Kramer, E.J. 1996 Adhesive contact of cylindrical lens  
189 and a flat sheet. *J. Appl. Phys.* **80**, 30-37. (doi:10.1063/1.362819).
- 190 [2] Kuznetsova, T.G., Starodubtseva, M.N., Yegorenkov, N.I., Chizhik, S.A. & Zhdanov, R.I. 2007  
191 Atomic force microscopy probing of cell elasticity. *Micron* **38**, 824-833.  
192 (doi:10.1016/j.micron.2007.06.011).
- 193 [3] Gavara, N. & Chadwick, R.S. 2012 Determination of the elastic moduli of thin samples and  
194 adherent cells using conical atomic force microscope tips. *Nat. Nanotechnol.* **7**, 733-736.  
195 (doi:10.1038/nnano.2012.163).
- 196 [4] Guo, Q.Q., Xia, Y., Sandig, M. & Yang, J. 2012 Characterization of cell elasticity correlated with  
197 cell morphology by atomic force microscope. *J. Biomech.* **45**, 304-309.  
198 (doi:10.1016/j.jbiomech.2011.10.031).
- 199 [5] Callow, J.A., Callow, M.E., Ista, L.K., Lopez, G. & Chaudhury, M.K. 2005 The influence of  
200 surface energy on the wetting behaviour of the spore adhesive of the marine alga *Ulva linza*  
201 (synonym *Enteromorpha linza*). *J. R. Soc. Interface* **2**, 319-325. (doi:10.1098/rsif.2005.0041).
- 202 [6] Walker, G.C., Sun, Y.J., Guo, S.L., Finlay, J.A., Callow, M.E. & Callow, J.A. 2005 Surface  
203 mechanical properties of the spore adhesive of the green alga *Ulva*. *J. Adhes.* **81**, 1101-1118.  
204 (doi:10.1080/00218460500310846).
- 205 [7] Sun, Y.J., Guo, S.L., Walker, G.C., Kavanagh, C.J. & Swain, G.W. 2004 Surface elastic modulus  
206 of barnacle adhesive and release characteristics from silicone surfaces. *Biofouling* **20**, 279-289.  
207 (doi:10.1080/08927010400026383).
- 208 [8] Plimpton, S. 1995 Fast Parallel Algorithms for Short-Range Molecular-Dynamics. *J. Comput.*  
209 *Phys.* **117**, 1-19. (doi:DOI 10.1006/jcph.1995.1039).
- 210 [9] Lin, S., Chen, C.T., Bdikin, I., Ball, V., Gracio, J. & Buehler, M.J. 2014 Tuning heterogeneous  
211 poly(dopamine) structures and mechanics: in silico covalent cross-linking and thin film  
212 nanoindentation. *Soft Matter* **10**, 457-464. (doi:10.1039/c3sm51810h).

213 [10] Stukowski, A. 2010 Visualization and analysis of atomistic simulation data with OVITO-the  
214 Open Visualization Tool. *Model. Simul. Mater. Sci. Eng.* **18**, 1-7. (doi:10.1088/0965-  
215 0393/18/1/015012).
